# Supplementary material for: Effects of hemodynamic alterations and oxygen saturation on cerebral perfusion in congenital heart disease
Source: PubMed Central journal article supplement (PMC11502515; doi:10.1038/s41390-024-03106-6), 2024-03-04
Supplement: 41390_2024_3106_MOESM1_ESM.pdf [file 41390_2024_3106_MOESM1_ESM.pdf]

## Supplementary Material

Table I. Effect of postmenstrual age, systemic-to-pulmonary shunt and aortic arch obstruction on cerebral oxygen delivery in deep and cortical gray matter.

|                                                         | <b>Beta</b> | <b>95% CI</b> | <b>p value</b> |
|---------------------------------------------------------|-------------|---------------|----------------|
| <b>Cerebral oxygen delivery in deep Gray Matter</b>     |             |               |                |
| Intercept                                               | 88          | -654 – 832    | 0.82           |
| Postmenstrual age, weeks                                | 9           | -8 – 26       | 0.32           |
| Systemic-to-pulmonary shunt: yes                        | -22         | -91 – 47      | 0.53           |
| Aortic arch obstruction: yes                            | 90          | -14 – 194     | 0.09           |
| <b>Cerebral oxygen delivery in cortical Gray Matter</b> |             |               |                |
| Intercept                                               | 200         | -298 – 698    | 0.44           |
| Postmenstrual age, weeks                                | 4           | -8 – 16       | 0.51           |
| Systemic-to-pulmonary shunt: yes                        | -33         | -80 – 13      | 0.17           |
| Aortic arch obstruction: yes                            | 30          | -39 – 98      | 0.41           |

Figure I. Differences in deep and cortical gray matter perfusion (A and B) and oxygen delivery (C and D) for patients with vs. without systemic-to-pulmonary shunt.

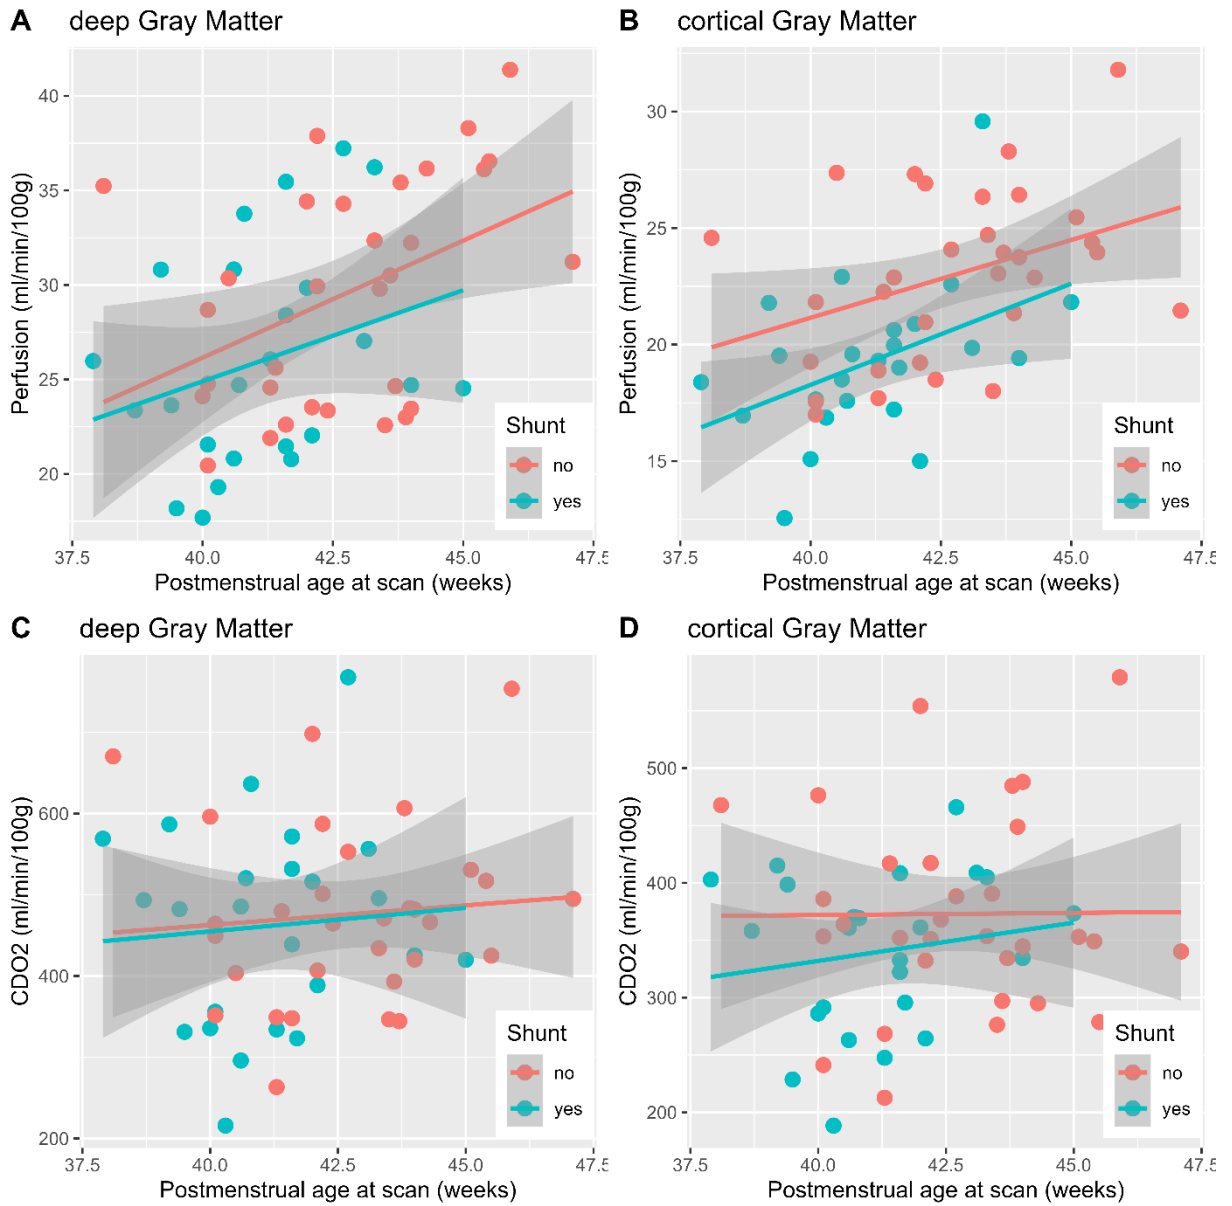

CDO<sub>2</sub>: cerebral oxygen delivery

Note: Values are not adjusted for presence of aortic arch obstruction (perfusion and CDO<sub>2</sub> plots) and oxygen saturation (perfusion plots).
